# Supplementary material for: COVID-19 Infections and Clinical Outcomes in Patients with Multiple Myeloma in New York City: A Cohort Study from Five Academic Centers
Source: Oxford University Press journal article supplement (doi:10.1158/2643-3230.bcd-20-0102), 2020-07-30
Supplement: 26433230bcd200102-sup-supplementarytable1.xlsx [file 26433230bcd200102-sup-supplementarytable1.xlsx]

## Sheet: Sheet1
			Table 1. Supplementary Table
			Detailed patients information on the 100 multiple myeloma patients
Patient number LINK	Patient number	Hospital	Gender	Age range at dx	MM stage	MEL/ASCT	Cardiovascular co-morbidity	Race/ethnicity	COVID-19 related thrombosis	Admitted	Combined endpoint
1	1	MSKCC	M	61-70	RRMM	Y	HTN, DM	Asian/Other	N	N	N
2	2	MSKCC	F	61-70	RRMM	Y	HTN	African American	N	Y	N
4	3	MSKCC	M	51-60	MM	N	HTN	African American	N	Y	N			MM=multiple myeloma stable disease
5	4	MSKCC	F	71-80	NDMM	N	COPD/asthma	White	N	Y	N			RRMM=relapse/refractory multiple myeloma
6	5	MSKCC	F	71-80	MM	Y	HTN, HLD	African American	N	N	N			NDMM=newly diagnosed multiple myeloma
7	6	MSKCC	F	>80	RRMM	N	HTN, DM	NA	N	Y	N			HTN=hypertension
8	7	MSKCC	M	51-60	MM	Y	HTN, DM	African American	N	Y	N			HLD=hyperlipidemia
9	8	MSKCC	M	51-60	MM	Y	HTN	African American	N	Y	Y			DM=diabetes mellitus
10	9	MSKCC	M	40-50	NDMM	N	N	Asian/Other	N	Y	N			TIA=transitory ischemia attack
11	10	MSKCC	F	>80	RRMM	N	HLD	White	N	Y	N			Afib=atrial fibrillation
12	11	MSKCC	M	51-60	RRMM	N	DM	African American	N	N	N			COPD=chronic obstructive pulmonary disease
14	12	MSKCC	F	71-80	NDMM	N	HTN, HLD, DM	African American	N	Y	N			OSA=obtructive sleep apnea
15	13	MSKCC	M	40-50	MM	N	N	White	N	Y	N			CAD=coronary artery disease
16	14	MSKCC	F	40-50	NDMM	N	N	Asian/Other	N	Y	N			CHF=cognestive heart failure
17	15	MSKCC	M	61-70	NDMM	N	CAD	African American	N	Y	Y			CVA=cerebrovascular accident
18	16	MSKCC	F	61-70	MM	Y	HTN	White	N	Y	N			MEL/ASCT=high dose melphalan and autologous stem cell transplant
19	17	MSKCC	M	40-50	NDMM	Y	N	Hispanic or Latino	N	Y	N			Combined end-point=mechanical ventilation, intensive care unit admission or death
20	18	MSKCC	M	71-80	MM	N	Afib	White	N	Y	N
21	19	MSKCC	F	71-80	RRMM	N	HTN, CKD	African American	N	Y	Y			MSKCC=Memorial Sloan Kettering Cancer Center
24	20	MSKCC	M	61-70	MM	Y	TIA	White	N	N	N			WMCM=Weill Cornell Medical Center
25	21	MSKCC	F	51-60	MM	Y	N	NA	N	N	N			Mount Sinai=Mount Sinai Health System
26	22	MSKCC	M	61-70	RRMM	Y	Afib	White	N	N	N			NYU=NYU Langone
27	23	MSKCC	F	40-50	RRMM	Y	N	White	N	Y	Y			Columbia=Columbia University Medical Center
28	24	MSKCC	F	51-60	MM	Y	N	White	N	N	N
29	25	MSKCC	F	51-60	RRMM	Y	N	African American	N	N	N
30	26	MSKCC	M	61-70	NDMM	N	HTN, DM	Asian/Other	Y	Y	Y
33	27	MSKCC	M	61-70	NDMM	N	HTN, TIA, Afib	White	N	Y	N
34	28	MSKCC	M	71-80	MM	Y	N	White	N	N	N
35	29	MSKCC	M	61-70	RRMM	Y	HTN, COPD, CKD	African American	N	Y	Y
36	30	MSKCC	M	51-60	NDMM	N	Afib	Hispanic or Latino	N	Y	Y
37	31	MSKCC	F	61-70	MM	Y	N	White	N	Y	N
38	32	MSKCC	M	40-50	MM	Y	OSA	Hispanic or Latino	N	N	N
39	33	MSKCC	M	40-50	RRMM	Y	HTN, DM	Hispanic or Latino	N	Y	Y
41	34	MSKCC	M	51-60	MM	N	N	White	N	N	N
42	35	MSKCC	M	61-70	MM	Y	N	White	N	Y	Y
43	36	MSKCC	F	61-70	NDMM	N	Afib	White	N	Y	N
44	37	MSKCC	M	61-70	MM	Y	HTN, HLD, DM	African American	N	Y	Y
46	38	MSKCC	M	51-60	MM	Y	HLD	White	N	N	N
47	39	MSKCC	M	71-80	MM	N	HTN, DM	White	N	N	N
48	40	MSKCC	F	71-80	RRMM	N	HTN, DM	African American	N	Y	N
49	41	MSKCC	F	61-70	NDMM	N	HTN, HLD	African American	N	N	N
50	42	MSKCC	F	51-60	MM	Y	N	African American	N	Y	N
52	43	MSKCC	F	61-70	RRMM	N	HTN, DM, CHF, CAD, CKD	African American	N	Y	Y
53	44	WCMC	M	>80	RRMM	N	HTN	African American	N	Y	N
54	45	WCMC	M	51-60	RRMM	Y	HTN, OSA	White	Y	Y	Y
55	46	WCMC	M	71-80	RRMM	Y	HTN, HLD, Afib	White	N	Y	N
56	47	WCMC	F	71-80	RRMM	Y	HTN	Hispanic or Latino	N	Y	N
57	48	WCMC	F	61-70	MM	Y	HTN, Afib	African American	N	Y	Y
58	49	WCMC	M	>80	MM	N	HTN, HLD	African American	Y	Y	Y
59	50	WCMC	F	>80	RRMM	Y	HTN, CVA	African American	N	Y	Y
60	51	WCMC	M	61-70	RRMM	N	HTN, CAD	White	N	Y	N
61	52	WCMC	M	71-80	MM	Y	N	White	N	N	N
62	53	WCMC	M	51-60	MM	Y	N	White	N	N	N
63	54	WCMC	M	51-60	NDMM	N	N	African American	N	N	N
64	55	WCMC	F	61-70	NDMM	N	HTN	White	N	N	N
65	56	WCMC	M	61-70	NDMM	N	HLD	White	N	N	N
66	57	Mount Sinai	M	71-80	RRMM	N	HLD	NA	N	Y	N
67	58	Mount Sinai	M	61-70	NDMM	N	HLD, DM, CAD	White	N	Y	N
68	59	Mount Sinai	M	71-80	NDMM	N	HTN, DM	Hispanic or Latino	N	Y	N
69	60	Mount Sinai	M	71-80	NDMM	N	Afib	Hispanic or Latino	N	Y	N
70	61	Mount Sinai	F	71-80	RRMM	N	HTN, DM, CAD	Hispanic or Latino	N	Y	N
71	62	Mount Sinai	F	61-70	RRMM	N	N	Hispanic or Latino	N	Y	Y
72	63	Mount Sinai	M	71-80	NDMM	N	HTN, HLD, Afib, CHF	African American	N	Y	N
73	64	Mount Sinai	F	40-50	RRMM	Y	N	African American	N	N	N
74	65	Mount Sinai	F	51-60	NDMM	Y	HTN	African American	N	N	N
75	66	Mount Sinai	M	71-80	RRMM	N	HTN	African American	N	Y	Y
76	67	Mount Sinai	F	51-60	NDMM	N	N	NA	N	Y	N
77	68	Mount Sinai	M	61-70	RRMM	N	HTN, HLD	African American	N	N	N
78	69	Mount Sinai	F	51-60	RRMM	Y	N	African American	N	Y	N
79	70	Mount Sinai	M	61-70	RRMM	N	HTN, HLD, DM	NA	N	Y	Y
80	71	Mount Sinai	M	51-60	RRMM	Y	N	White	N	Y	N
81	72	Mount Sinai	F	61-70	MM	Y	N	Hispanic or Latino	N	Y	Y
82	73	Mount Sinai	F	>80	NDMM	N	HTN, HLD	Hispanic or Latino	Y	Y	Y
83	74	Mount Sinai	F	40-50	NDMM	N	DM, CHF, CAD, Afib	White	N	Y	N
84	75	Mount Sinai	M	61-70	MM	N	HTN, HLD, DM, Afib, cardiomyopathy	African American	N	Y	N
85	76	Mount Sinai	M	61-70	RRMM	N	HTN, HLD, CHF	African American	N	Y	Y
86	77	Mount Sinai	M	>80	NDMM	N	HTN, CHF	White	N	Y	N
87	78	Mount Sinai	F	51-60	NDMM	N	N	Hispanic or Latino	N	Y	Y
88	79	Mount Sinai	M	71-80	RRMM	N	HTN, HLD, DM	Hispanic or Latino	N	Y	N
91	80	NYU	M	51-60	MM	Y	HTN	Hispanic or Latino	N	Y	N
108	81	NYU	M	71-80	MM	Y	HTN, COPD/asthma	White	N	Y	Y
109	82	NYU	M	51-60	MM	N	N	Hispanic or Latino	Y	Y	N
110	83	NYU	M	51-60	RRMM	N	HTN, OSA	White	N	Y	N
111	84	NYU	F	71-80	MM	N	HTN	African American	N	Y	N
112	85	NYU	M	>80	MM	N	N	White	N	Y	N
113	86	NYU	M	>80	MM	N	HTN, HLD	White	N	Y	N
114	87	NYU	F	61-70	MM	Y	HTN, HLD	White	N	N	N
115	88	NYU	M	>80	RRMM	N	HTN	White	N	Y	N
116	89	NYU	F	61-70	NDMM	N	HTN	African American	Y	Y	Y
117	90	NYU	M	71-80	MM	N	N	Hispanic or Latino	N	Y	Y
118	91	NYU	F	51-60	NDMM	N	HTN	NA	N	Y	Y
119	92	Columbia	M	61-70	RRMM	Y	Afib	Hispanic or Latino	N	N	N
120	93	Columbia	M	51-60	NDMM	N	N	African American	N	Y	N
121	94	Columbia	F	>80	NDMM	N	HTN	Hispanic or Latino	Y	Y	Y
122	95	Columbia	F	71-80	NDMM	N	N	White	N	Y	Y
123	96	Columbia	F	>80	NDMM	N	HTN	White	N	Y	N
124	97	Columbia	F	>80	RRMM	N	HTN	Hispanic or Latino	N	Y	N
125	98	Columbia	M	61-70	MM	Y	HTN	Hispanic or Latino	N	Y	Y
126	99	Columbia	M	61-70	MM	N	HTN	African American	NA	Y	N
127	100	Columbia	F	>80	RRMM	N	HTN	Hispanic or Latino	NA	N	N
